# Supplementary material for: Exocytosis of ATP From Astrocytes Modulates Phasic and Tonic Inhibition in the Neocortex
Source: PLOS journal article supplement (doi:10.1371/journal.pbio.1001747), 2014-01-07
Supplement: S20 (10.1371/journal.pbio.1001747.s020) [file journal.pbio.1001747.s020]

**Table S2****Bafilomycin inhibits release of ATP from cortical astrocytes *in situ*.**

Spontaneous excitatory purinergic currents (mEPSCs) were recorded in the pyramidal cortical neuron at of -80 mV in presence of 50  $\mu$ M NBQX, 30 $\mu$ M D-AP5 and 100  $\mu$ M picrotoxin in control and bafilomycin-treated neocortical slices. Treatment with bafilomycin A1 dramatically inhibited the baseline frequency of purinergic mEPSCs and prevented the TFLLR-induced burst of purinergic mEPSCs. The effects of bafilomycin on the frequency and amplitude of mEPSCs were statistically significant with  $P < 0.01$  both for baseline conditions and TFLLR application.

|                                           | Control<br>(n=12) | Bafilomycin<br>(n =6) |
|-------------------------------------------|-------------------|-----------------------|
| <b>Frequency of purinergic mEPSCs, Hz</b> |                   |                       |
| Baseline                                  | 0.63 $\pm$ 0.08   | 0.053 $\pm$ 0.019     |
| After application of TFLLR                | 1.37 $\pm$ 0.14   | 0.052 $\pm$ 0.017     |
| <b>Amplitude of purinergic mEPSCs, pA</b> |                   |                       |
| Baseline                                  | 8.87 $\pm$ 1.78   | 2.75 $\pm$ 0.85       |
| After application of TFLLR                | 5.72 $\pm$ 1.44   | 2.78 $\pm$ 0.69       |
